# Supplementary material
Source: PubMed Central journal article supplement (PMC4394800)
Supplement: AAC.04907-14_zac005153954so1.pdf [file AAC.04907-14_zac005153954so1.pdf]

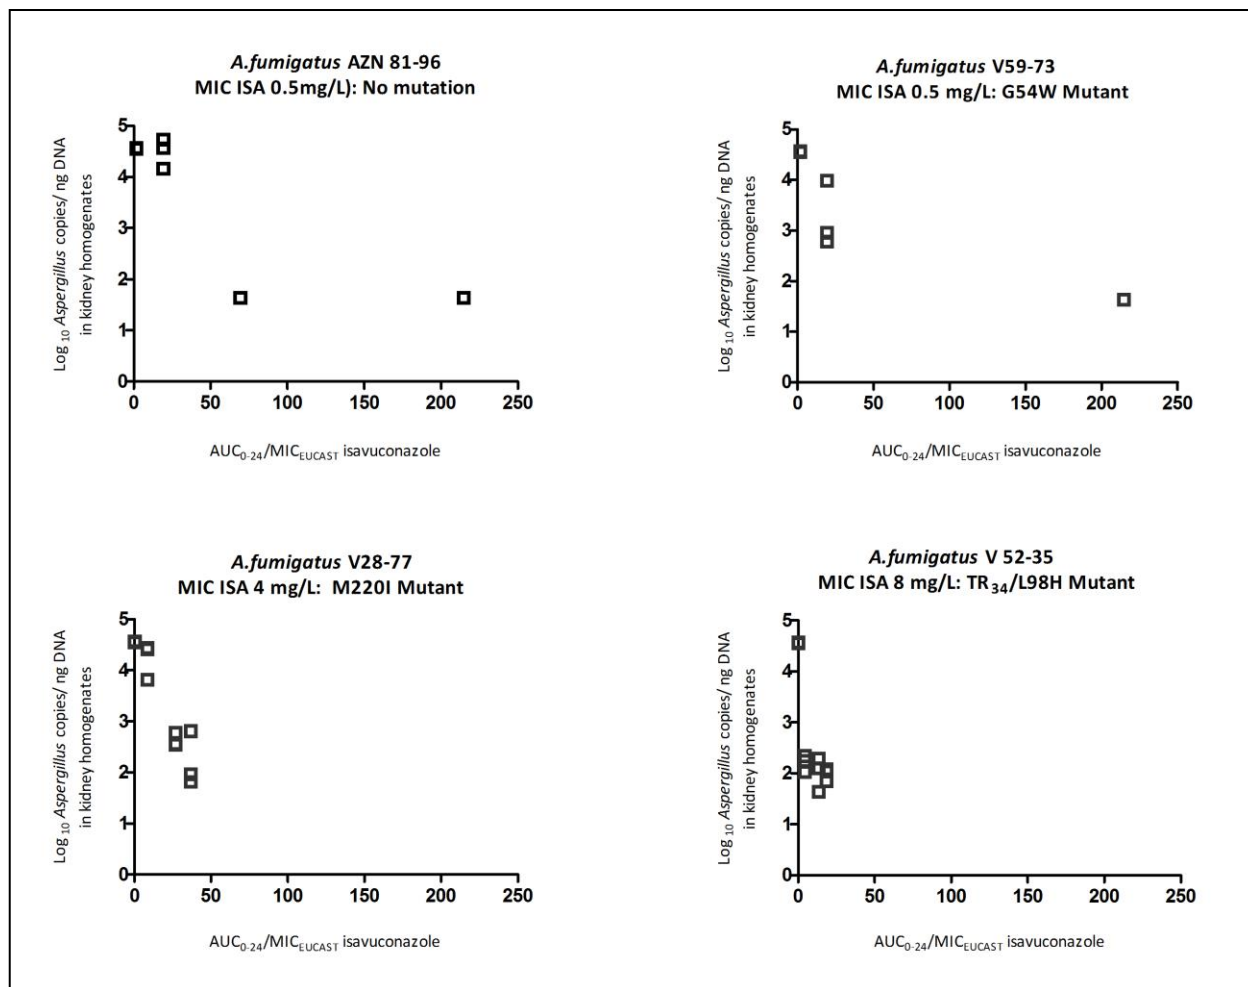

**Supplementary figure 1.** Efficacy of isavuconazole against 4 *A. fumigatus* isolates, as a function of the prodrug isavuconazonium sulfate (BAL8557)  $\text{AUC}_{0-24}/\text{MIC}_{\text{EUCAST}}$  ratio expressed as *A. fumigatus* DNA load (copies/ng DNA) in kidneys at 72h post challenge. For all groups,  $n=3$ . Doses were administered as the prodrug isavuconazonium sulfate (BAL8557).
